# Supplementary material for: Health-related quality of life and fatigue in children and adults with pyruvate kinase deficiency
Source: PubMed Central journal article supplement — Blood Adv. 2022 Mar 16;6(6):1844–53. doi: 10.1182/bloodadvances.2021004675 (PMC8941458; doi:10.1182/bloodadvances.2021004675), 2022-03-16
Supplement: advancesADV2021004675-suppl1.pdf [file advancesADV2021004675-suppl1.pdf]

**Health-Related Quality of Life and Fatigue in Children and Adults with Pyruvate Kinase  
Deficiency**

**SUPPLEMENTARY APPENDIX**

**Supplemental Table 1. List of Site Investigators (Enrolling sites)**

| Principal Investigator                | Institution                                                                                                             |
|---------------------------------------|-------------------------------------------------------------------------------------------------------------------------|
| <b>United States, enrollment: 154</b> |                                                                                                                         |
| Heather A. Bradeen, MD                | The University of Vermont Children’s Hospital, Burlington, VT                                                           |
| Sateesh Chonat, MD                    | Emory University School of Medicine , Aflac Cancer and Blood Disorders Center, Children’s Healthcare of Atlanta, GA     |
| Jenny M. Despotovic, DO               | Texas Children’s Hematology Center, Baylor College of Medicine, Houston, TX                                             |
| Bertil Glader, MD, PhD                | Lucile Packard Children’s Hospital, Stanford University School of Medicine, Palo Alto, CA                               |
| Rachael F. Grace, MD                  | Dana-Farber/Boston Children’s Cancer and Blood Disorders Center, Boston, MA                                             |
| Christine M. Knoll, MD                | Phoenix Children’s Hospital, Phoenix, AZ                                                                                |
| Melissa McNaull, MD                   | University of Mississippi Medical Center, Jackson, MS                                                                   |
| D. Holmes Morton, MD                  | Central Pennsylvania Clinic for Special Children & Adults, Belleville, PA<br>Lancaster General Hospital, Lancaster, PA  |
| Peter E. Newburger, MD                | University of Massachusetts Medical School, Worcester, MA                                                               |
| Janet L. Kwiatkowski, MD, MSCE        | Children’s Hospital of Philadelphia and Perelman School of Medicine of the University of Pennsylvania, Philadelphia, PA |
| Latika Puri, MD                       | St. Jude Children’s Research Hospital, Memphis, TN                                                                      |
| Yaddanapudi Ravindranath, MD, MBBS    | Wayne State University School of Medicine, Children’s Hospital of Michigan, Detroit, MI                                 |

|                                                |                                                                                                                         |
|------------------------------------------------|-------------------------------------------------------------------------------------------------------------------------|
| Melissa J. Rose, DO                            | Nationwide Children's Hospital, The Ohio State University College of Medicine, Columbus, OH                             |
| Jennifer A. Rothman, MD                        | Duke University Medical Center, Durham, NC                                                                              |
| Mukta Sharma, MD                               | Children's Mercy Hospital, Kansas City, MO                                                                              |
| Sujit Sheth, MD                                | Weill Cornell Medical College, New York, NY                                                                             |
| Alexis A. Thompson, MD                         | Ann & Robert H. Lurie Children's Hospital of Chicago, Chicago, IL                                                       |
| Heng Wang, MD, PhD                             | DDC Clinic for Special Needs Children, Middlefield, OH                                                                  |
| Hassan M. Yaish, MD                            | Primary Children's Hospital, University of Utah, Salt Lake City, UT                                                     |
| <b>Canada, enrollment: 14</b>                  |                                                                                                                         |
| Vicky R Breakey, MD<br>Madeleine Verhovsek, MD | McMaster University, Hamilton, ON, Canada                                                                               |
| Kevin H.M. Kuo, MD, MSc, FRCPC                 | University of Toronto, University Health Network, Toronto, ON                                                           |
| Yves D. Pastore, MD                            | CHU Sainte-Justine, Montreal, Canada                                                                                    |
| <b>Italy, enrollment: 25</b>                   |                                                                                                                         |
| Wilma Barcellini, MD                           | Fondazione IRCCS Ca' Granda Ospedale Maggiore Policlinico, Milan                                                        |
| <b>Netherlands, enrollment: 23</b>             |                                                                                                                         |
| Eduard J. van Beers, MD                        | Van Creveldkliniek, University Medical Center Utrecht, Utrecht University, Utrecht                                      |
| <b>Germany, enrollment: 31</b>                 |                                                                                                                         |
| Stefan W. Eber, MD                             | Schwerpunktpraxis für Pädiatrische Hämatologie-Onkologie and Children's Hospital, Technical University, Munich, Germany |

|                                      |                                                           |
|--------------------------------------|-----------------------------------------------------------|
| Susanne Holzhauer, MD                | Charite, Berlin, Germany                                  |
| Nina Kollmar, MD                     | Klinikum Kassel GmbH, Kassel, Germany                     |
| Joachim Kunz, MD, PhD                | Zentrum für Kinder-und Jugendmedizin, Heidelberg, Germany |
| Marcin W. Wlodarski, MD, PhD         | University of Freiburg, Freiburg, Germany                 |
| <b>Czech Republic, enrollment: 7</b> |                                                           |
| Dagmar Pospíšilová, MD               | Fakultni nemocnice Olomouc, Czech Republic                |

**Supplemental Table 2. Scoring and availability of quality of life measures by age group and language**

|                                           | <b>EQ-5D</b>                                                                                                                                                         | <b>FACT-An</b>                                                   | <b>PROMIS Fatigue SF-7a</b>                                                      | <b>PedsQL 4.0</b>                                                           | <b>pedsFACIT-F</b>                                               | <b>PROMIS Fatigue SF</b>                                                         |
|-------------------------------------------|----------------------------------------------------------------------------------------------------------------------------------------------------------------------|------------------------------------------------------------------|----------------------------------------------------------------------------------|-----------------------------------------------------------------------------|------------------------------------------------------------------|----------------------------------------------------------------------------------|
| <b>Age Group</b>                          | ≥18 y                                                                                                                                                                | ≥18 y                                                            | ≥18 y                                                                            | <u>Parent Proxy:</u><br>children 2-17 y<br><u>Child Self-report:</u> 5-17 y | Child report:<br>ages 8-17 y                                     | <u>Parent proxy 10a:</u> children 5-17 y<br><u>Child Self-report 10a:</u> 8-17 y |
| <b>Languages available for this study</b> | English, Spanish, Canadian French, German, Italian, Dutch                                                                                                            | English, French, German, Italian, Russian, Dutch, Spanish, Czech | English, Spanish                                                                 | English, French, German, Italian, Dutch, Spanish                            | English, French, German, Italian, Russian, Dutch, Spanish, Czech | English, Spanish                                                                 |
| <b>Scoring</b>                            | <u>Visual Analog Scale:</u> Higher score represents best health (0-100)<br><br><u>Health Utility Score<sup>1</sup>:</u> Higher score represents full health (0 to 1) | Higher score represents low fatigue (0-188)                      | Higher score represent more fatigue (T-scores: standard score mean of 50, SD 10) | Higher score represents full health (0-100)                                 | Higher score represents low fatigue (0-52)                       | Higher score represent more fatigue (T-scores: standard score mean of 50, SD 10) |

|                                      |                                                                                |         |        |                                                                 |        |                                                                     |
|--------------------------------------|--------------------------------------------------------------------------------|---------|--------|-----------------------------------------------------------------|--------|---------------------------------------------------------------------|
| <b>Completion rate at enrollment</b> | <u>Visual Analog Scale:</u> 120/131<br><br><u>Health Utility Score:</u> 86/131 | 126/131 | 60/131 | <u>Parent Proxy:</u> 86/123<br><u>Child Self-report:</u> 61/123 | 47/123 | <u>Parent proxy 10a:</u> 48/123<br><u>Child Self-report:</u> 36/123 |
|--------------------------------------|--------------------------------------------------------------------------------|---------|--------|-----------------------------------------------------------------|--------|---------------------------------------------------------------------|

<sup>1</sup> Health Utility Score could only be analysed for participants from the US, Germany, and the Netherlands
